# Supplementary material
Source: PubMed Central journal article supplement (PMC2141801)
Supplement: pnas_0708296104_8.pdf [file pnas_0708296104_8.pdf]

**Table 2. Extracted values of  $D_{\text{NH}}$ ,  $D_{\text{NH}}^{\text{A}}$ ,  $D_{\text{NH}}^{\text{B}}$ ,  $\sigma_{\text{N}}$  and reduced  $\chi^2$  obtained from fits of relaxation dispersion data recorded on the Abp1p SH3 domain with 6.8% bound Ark1p peptide, ~ 25 mg/ml Pf1 phage, 25°C.**

| Residue | $D_{\text{NH}}(\text{Hz})$ | err | $D_{\text{NH}}^{\text{A}}$ | err | $D_{\text{NH}}^{\text{B}}$ | err | (ppm) | err  | $\chi^2_{\text{red}}$ | $R_{\text{ZZ}}-R_1$ |
|---------|----------------------------|-----|----------------------------|-----|----------------------------|-----|-------|------|-----------------------|---------------------|
| 3       | -8.5                       | 4.1 | 5.4                        | 0.3 | 13.9                       | 4.1 | -0.17 | 0.05 | 0.5                   | 1.0                 |
| 5       | -6.7                       | 1.5 | 3.8                        | 0.3 | 10.5                       | 1.5 | -0.45 | 0.05 | 0.5                   | 1.3                 |
| 8       | 6.7                        | 1.5 | -4.1                       | 0.3 | -10.8                      | 1.5 | 0.88  | 0.05 | 0.7                   | 1.5                 |
| 9       | 11.1                       | 1.7 | -5.9                       | 0.3 | -17.0                      | 1.7 | -0.32 | 0.05 | 0.5                   | 0.9                 |
| 10      | 3.7                        | 1.5 | -4.4                       | 0.3 | -8.1                       | 1.5 | -0.59 | 0.05 | 0.5                   | 1.1                 |
| 11      | 3.4                        | 1.5 | -4.5                       | 0.3 | -7.9                       | 1.6 | 0.34  | 0.05 | 0.5                   | 0.8                 |
| 12      | 0.1                        | 2.0 | -0.2                       | 0.3 | -0.3                       | 2.1 | 0.28  | 0.05 | 0.4                   | 1.2                 |
| 13      | -5.3                       | 1.8 | 4.4                        | 0.3 | 9.7                        | 1.8 | 0.30  | 0.05 | 0.6                   | 1.9                 |
| 14      | -2.2                       | 1.5 | 2.3                        | 0.3 | 4.5                        | 1.5 | 1.11  | 0.05 | 0.7                   | 1.5                 |
| 15*     | -9.1                       | 2.7 | 3.0                        | 0.3 | 12.1                       | 2.7 | 2.00  | 0.05 | 1.4                   | 11.0                |
| 16      | 2.3                        | 1.5 | -2.6                       | 0.3 | -4.9                       | 1.5 | 0.71  | 0.05 | 0.8                   | 3.0                 |
| 17      | -4.9                       | 1.5 | 2.0                        | 0.3 | 7.0                        | 1.5 | 1.03  | 0.05 | 0.5                   | 1.1                 |
| 18      | -7.6                       | 1.5 | 6.1                        | 0.3 | 13.7                       | 1.5 | 0.49  | 0.05 | 0.7                   | 0.6                 |
| 19      | 3.5                        | 1.5 | -6.9                       | 0.3 | -10.3                      | 1.5 | 0.40  | 0.05 | 0.4                   | 1.0                 |
| 23      | -5.4                       | 4.6 | 6.1                        | 0.3 | 11.5                       | 4.6 | 0.13  | 0.05 | 0.5                   | 1.0                 |
| 26      | -1.9                       | 4.0 | 3.8                        | 0.3 | 5.7                        | 4.0 | 0.16  | 0.05 | 0.6                   | 0.9                 |
| 29      | -0.8                       | 3.3 | 4.9                        | 0.3 | 5.7                        | 3.3 | 0.17  | 0.05 | 0.5                   | 0.9                 |
| 30      | -3.0                       | 1.5 | 0.0                        | 0.3 | 3.0                        | 1.5 | 0.43  | 0.05 | 0.6                   | 0.9                 |
| 31      | 3.9                        | 2.3 | -4.3                       | 0.3 | -8.2                       | 2.3 | -2.00 | 0.05 | 1.4                   | 3.5                 |
| 33      | 3.9                        | 1.7 | 6.0                        | 0.3 | 2.1                        | 1.7 | -1.76 | 0.05 | 1.1                   | 1.2                 |
| 34      | -0.7                       | 3.8 | 6.0                        | 0.3 | 6.7                        | 3.8 | -3.70 | 0.05 | 1.4                   | 2.1                 |
| 35      | -1.1                       | 1.5 | 4.4                        | 0.3 | 5.5                        | 1.5 | 0.93  | 0.05 | 0.7                   | 2.6                 |
| 36      | 0.6                        | 1.6 | 5.0                        | 0.3 | 4.3                        | 1.6 | 0.49  | 0.05 | 0.7                   | 2.2                 |
| 37      | 6.2                        | 2.7 | 1.2                        | 0.3 | -5.0                       | 2.7 | 1.70  | 0.05 | 1.2                   | 1.6                 |
| 49      | -6.8                       | 1.5 | 2.1                        | 0.3 | 8.9                        | 1.5 | 0.92  | 0.05 | 1.2                   | 1.1                 |
| 52      | 1.5                        | 1.5 | 6.7                        | 0.3 | 5.2                        | 1.5 | 1.30  | 0.05 | 1.0                   | 1.6                 |
| 53      | -2.2                       | 1.5 | 3.7                        | 0.3 | 6.0                        | 1.5 | -0.86 | 0.05 | 1.0                   | 1.6                 |

Values of  $D_{\text{NH}}^{\text{A}}$ , corresponding to dipolar couplings of the (observed) apo state were obtained using the IPAP method [Ottiger, M., Delaglio, F. & Bax, A. (1998) *J. Magn. Reson.* **131**, 373-8], while dipolar coupling values of the invisible bound state,  $D_{\text{NH}}^{\text{B}} = D_{\text{NH}}^{\text{A}} - D_{\text{NH}}$  were calculated from measured  $D_{\text{NH}}$  values obtained from fits of relaxation dispersion data recorded at 500 and 800 MHz using the pulse sequences of Fig. 2 and SI Fig. 5. Data for which  $\sigma_{\text{N}} < 0.2$  ppm or reduced  $\chi^2 > 2.0$  are not included (gray) in Fig. 3e. Values of  $R_{\text{ZZ}}-R_1$  have been measured experimentally and correspond to the difference in relaxation rates between  $2S_{\text{Z}}I_{\text{Z}}$  ( $R_{\text{ZZ}}$ ) and  $S_{\text{Z}}$  ( $R_1$ ). Note that the cross-relaxation rate between TROSY and anti-TROSY magnetization components due to

external  $^1\text{H}$  spins is given by  $0.5(R_{ZZ}-R_1)$ . Fitted values of  $k_{on}[L]+k_{off} = 374\pm 5 \text{ s}^{-1}$  ( $P + L \xrightleftharpoons[k_{off}]{k_{on}} PL$ ) and  $p_B = 6.8\pm 0.05\%$  (population of bound state) were obtained.

\*This residue is the largest outlier in the correlation plot of Fig. 3e (see main text) that may reflect the fact that the  $^1\text{H}$  spin flip rate is 3-fold faster than for all other residues.
