# Supplementary material
Source: PubMed Central journal article supplement (PMC2141801)
Supplement: pnas_0708296104_9.pdf [file pnas_0708296104_9.pdf]

**Table 3. Extracted values of  $D_{\text{NH}}$ ,  $D_{\text{NH}}^{\text{A}}$ ,  $D_{\text{NH}}^{\text{B}}$ ,  $\sigma_{\text{N}}$  and reduced  $\chi^2$  obtained from fits of relaxation dispersion data recorded on G48M Fyn SH3, ~ 35 mg/ml Pf1 phage, 25°C.**

| Residue | $D_{\text{NH}}(\text{Hz})$ | err  | $D_{\text{NH}}^{\text{A}}$ | err | $D_{\text{NH}}^{\text{B}}$ | err  | (ppm)  | err  | $\chi^2_{\text{red}}$ | $R_{\text{zz}}-R_1$ |
|---------|----------------------------|------|----------------------------|-----|----------------------------|------|--------|------|-----------------------|---------------------|
| 5       | 1.6                        | 5.2  | 4.9                        | 0.3 | 3.3                        | 5.2  | -3.54  | 0.05 | 1.1                   | 1.1                 |
| 7       | 3.6                        | 10.0 | -3.6                       | 0.3 | -7.2                       | 10.0 | 5.95   | 0.05 | 1.3                   | 1.3                 |
| 8       | -28.9                      | 11.0 | -12.3                      | 0.3 | 16.6                       | 11.0 | -8.01  | 0.05 | 1.4                   | 1.4                 |
| 9       | -15.4                      | 4.9  | -17.2                      | 0.3 | -1.7                       | 4.9  | -4.53  | 0.05 | 1.1                   | 0.9                 |
| 10      | -26.4                      | 2.8  | -20.9                      | 0.3 | 5.5                        | 2.8  | 2.57   | 0.05 | 1.2                   | 0.7                 |
| 11      | -14.0                      | 7.8  | -15.0                      | 0.3 | -1.0                       | 7.8  | 5.77   | 0.05 | 1.5                   | 1.6                 |
| 12      | -11.0                      | 1.8  | -11.8                      | 0.3 | -0.8                       | 1.8  | 2.01   | 0.05 | 0.7                   | 1.1                 |
| 13      | 4.5                        | 2.1  | 4.5                        | 0.3 | -0.1                       | 2.1  | 1.76   | 0.05 | 1.0                   | 5.3                 |
| 14      | 13.2                       | 6.5  | 4.0                        | 0.3 | -9.2                       | 6.5  | -4.16  | 0.05 | 1.7                   | 6.8                 |
| 15      | 3.0                        | 12.0 | 4.1                        | 0.3 | 1.1                        | 12.0 | -3.32  | 0.05 | 1.8                   | 22.6                |
| 17      | 23.1                       | 11.2 | -0.5                       | 0.3 | -23.5                      | 11.2 | -0.06  | 0.05 | 0.5                   | 2.0                 |
| 19      | -6.1                       | 1.5  | -4.3                       | 0.3 | 1.8                        | 1.5  | -0.63  | 0.05 | 0.5                   | 1.2                 |
| 20      | -22.7                      | 9.4  | -22.7                      | 0.3 | 0.1                        | 9.4  | -6.43  | 0.05 | 1.5                   | 1.4                 |
| 21      | -17.0                      | 2.0  | -21.2                      | 0.3 | -4.2                       | 2.0  | -2.16  | 0.05 | 1.1                   | 2.3                 |
| 22      | -1.5                       | 3.1  | -1.5                       | 0.3 | -0.0                       | 3.1  | 0.26   | 0.05 | 0.5                   | 1.9                 |
| 23      | -8.2                       | 5.7  | -3.5                       | 0.3 | 4.7                        | 5.7  | 6.07   | 0.05 | 1.0                   | 2.1                 |
| 24      | -7.9                       | 2.8  | -8.7                       | 0.3 | -0.7                       | 2.8  | 3.39   | 0.05 | 0.9                   | 1.4                 |
| 26      | 14.0                       | 3.2  | 12.1                       | 0.3 | -1.9                       | 3.2  | -3.44  | 0.05 | 0.9                   | 1.4                 |
| 27      | 26.9                       | 1.6  | 24.2                       | 0.3 | -2.7                       | 1.7  | -0.73  | 0.05 | 0.6                   | 1.1                 |
| 28      | 33.3                       | 6.7  | 22.6                       | 0.3 | -10.7                      | 6.7  | 4.10   | 0.05 | 1.8                   | 0.8                 |
| 29      | 14.3                       | 1.7  | 7.8                        | 0.3 | -6.5                       | 1.7  | 1.92   | 0.05 | 1.0                   | 1.6                 |
| 30      | 12.8                       | 4.6  | 0.1                        | 0.3 | -12.6                      | 4.6  | -3.78  | 0.05 | 1.3                   | 3.5                 |
| 33      | 0.2                        | 2.3  | -2.6                       | 0.3 | -2.9                       | 2.4  | -0.40  | 0.05 | 0.5                   | 9.0                 |
| 34      | 1.5                        | 1.5  | 0.1                        | 0.3 | -1.4                       | 1.5  | -0.66  | 0.05 | 0.5                   | 6.4                 |
| 35      | 9.8                        | 1.7  | -0.4                       | 0.3 | -10.2                      | 1.7  | -1.71  | 0.05 | 0.9                   | 13.9                |
| 36      | 0.8                        | 7.3  | -2.4                       | 0.3 | -3.2                       | 7.3  | -0.16  | 0.05 | 0.2                   | 1.3                 |
| 37      | -12.0                      | 2.2  | -3.9                       | 0.3 | 8.0                        | 2.3  | 2.74   | 0.05 | 0.8                   | 1.1                 |
| 38      | 15.6                       | 2.5  | 13.6                       | 0.3 | -2.0                       | 2.5  | 2.35   | 0.05 | 0.8                   | 0.8                 |
| 39      | 19.0                       | 7.7  | 21.0                       | 0.3 | 2.0                        | 7.7  | 7.43   | 0.05 | 1.5                   | 1.1                 |
| 40      | 27.5                       | 1.6  | 26.5                       | 0.3 | -1.0                       | 1.6  | 0.88   | 0.05 | 0.8                   | 1.1                 |
| 41      | 41.0                       | 6.0  | 21.1                       | 0.3 | -20.0                      | 6.0  | 3.53   | 0.05 | 1.8                   | 1.4                 |
| 42      | -24.8                      | 12.0 | -9.4                       | 0.3 | 15.4                       | 12.0 | 6.36   | 0.05 | 2.2                   | 1.6                 |
| 43      | -18.7                      | 3.3  | -15.9                      | 0.3 | 2.8                        | 3.3  | 2.70   | 0.05 | 1.2                   | 4.6                 |
| 44      | -7.3                       | 26.0 | -10.1                      | 0.3 | -2.8                       | 26.0 | -6.56  | 0.05 | 2.8                   | 8.8                 |
| 46      | 13.8                       | 6.5  | -1.9                       | 0.3 | -15.7                      | 6.5  | -0.12  | 0.05 | 0.4                   | 12.9                |
| 47      | 15.0                       | 1.5  | 12.3                       | 0.3 | -2.7                       | 1.5  | 1.39   | 0.05 | 0.8                   | 1.3                 |
| 48      | 28.7                       | 2.6  | 24.8                       | 0.3 | -3.9                       | 2.6  | 0.36   | 0.05 | 0.7                   | 1.4                 |
| 49      | 26.7                       | 1.6  | 23.2                       | 0.3 | -3.5                       | 1.6  | -1.29  | 0.05 | 0.9                   | 0.8                 |
| 50      | -4.3                       | 11.0 | 7.5                        | 0.3 | 11.8                       | 11.0 | -9.02  | 0.05 | 1.3                   | 0.9                 |
| 52      | 7.0                        | 10.0 | -2.3                       | 0.3 | -9.3                       | 10.0 | 5.25   | 0.05 | 2.0                   | 2.1                 |
| 54      | -6.8                       | 2.4  | -4.9                       | 0.3 | 1.9                        | 2.4  | -2.71  | 0.05 | 0.6                   | 2.1                 |
| 55      | -6.8                       | 14.0 | -4.7                       | 0.3 | 2.1                        | 14.0 | -15.93 | 0.06 | 1.3                   | 1.1                 |
| 56      | -9.2                       | 13.0 | -3.9                       | 0.3 | 5.3                        | 13.0 | -8.03  | 0.05 | 1.7                   | 1.1                 |

Values of  $D_{\text{NH}}^{\text{A}}$ , corresponding to dipolar couplings of the (observed) folded state were obtained using the IPAP method [Ottiger, M., Delaglio, F. & Bax, A. (1998) *J. Magn. Reson.* **131**, 373-8], while dipolar coupling values of the unfolded (invisible, excited) state,

$D_{\text{NH}}^{\text{B}} = D_{\text{NH}}^{\text{A}} - D_{\text{NH}}$  were calculated from measured  $D_{\text{NH}}$  values obtained from fits of relaxation dispersion data recorded at 500 and 800 MHz using the pulse sequences of Fig. 2 and SI Fig. 5. Data for which  $\nu_{\text{N}} < 0.2$  ppm, reduced  $\chi^2 > 2.0$  or errors in  $D_{\text{NH}} > 5$  Hz are not included (gray) in Fig. 4c. Values of  $R_{\text{ZZ}} - R_1$  have been measured experimentally and correspond to the difference in relaxation rates between  $2S_{\text{Z}}I_{\text{Z}}$  ( $R_{\text{ZZ}}$ ) and  $S_{\text{Z}}$  ( $R_1$ ). Note that the cross-relaxation rate between TROSY and anti-TROSY magnetization components due to  $^1\text{H}$  spins is given by  $0.5(R_{\text{ZZ}} - R_1)$ . Fitted values of  $k_{\text{ex}} = 470 \pm 10 \text{ s}^{-1}$  and  $p_{\text{B}} = 4.2 \pm 0.05\%$  (population of unfolded state) were obtained.
