# Supplementary material
Source: PubMed Central journal article supplement (PMC2141801)

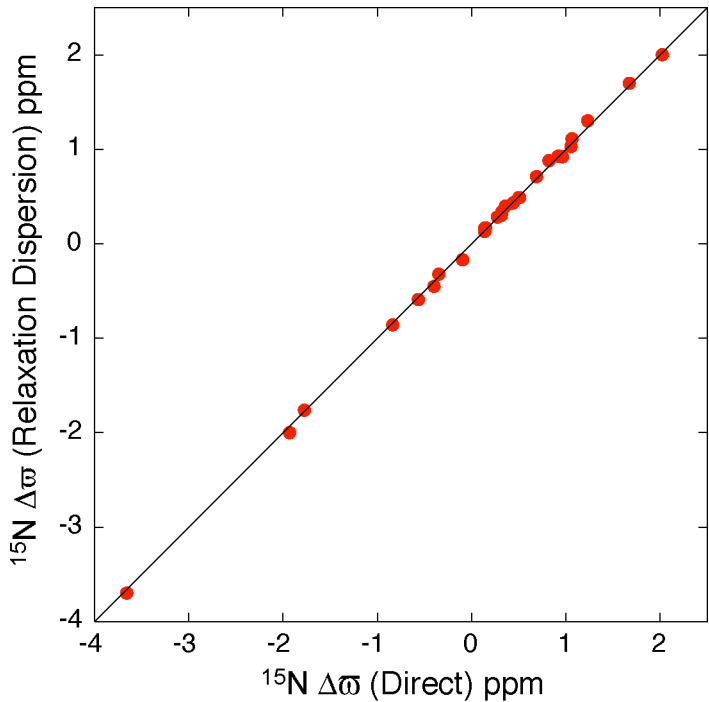

Supplement: pnas_0708296104_2.pdf [file pnas_0708296104_2.pdf]

6.8% Bound

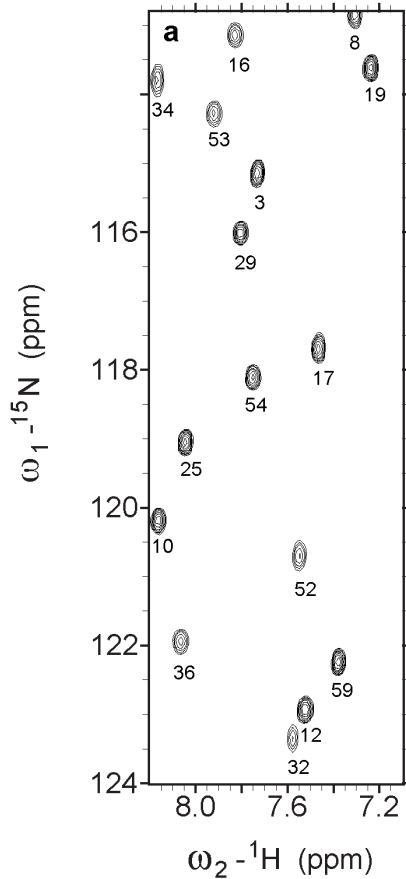

0% Bound

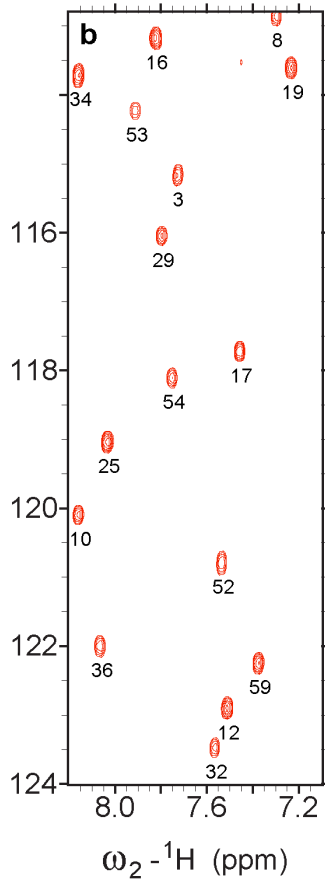

100% Bound

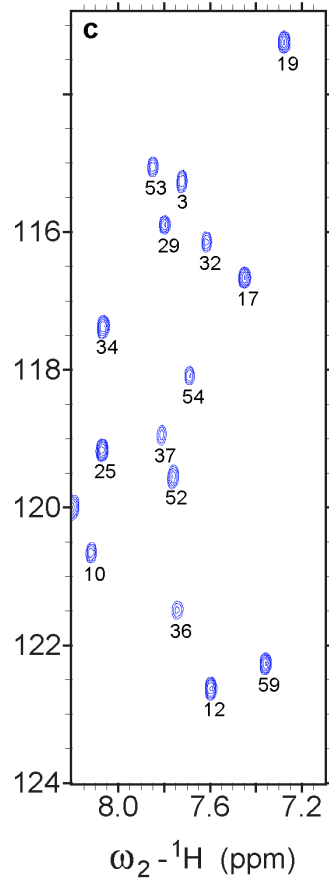

Supplement: pnas_0708296104_3.pdf [file pnas_0708296104_3.pdf]

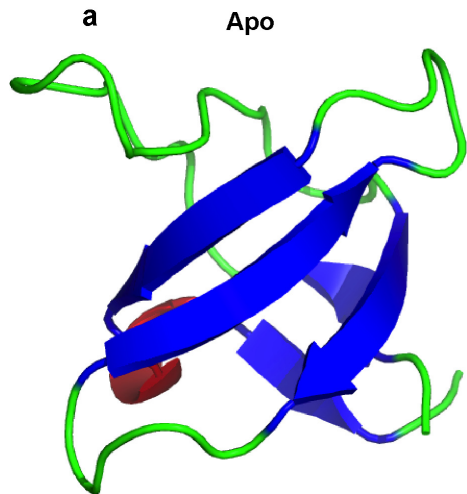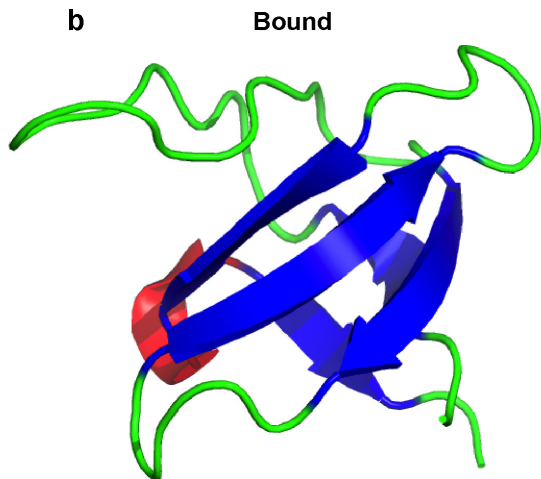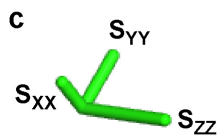

Direct

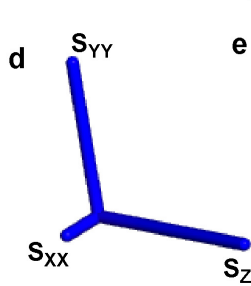

CPMG

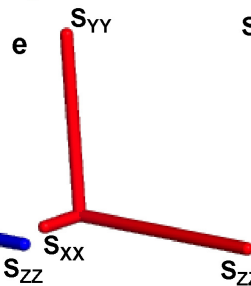

Direct

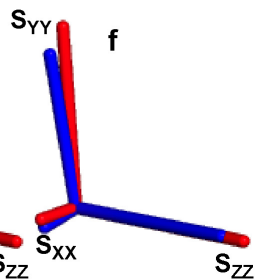

Supplement: pnas_0708296104_4.pdf [file pnas_0708296104_4.pdf]

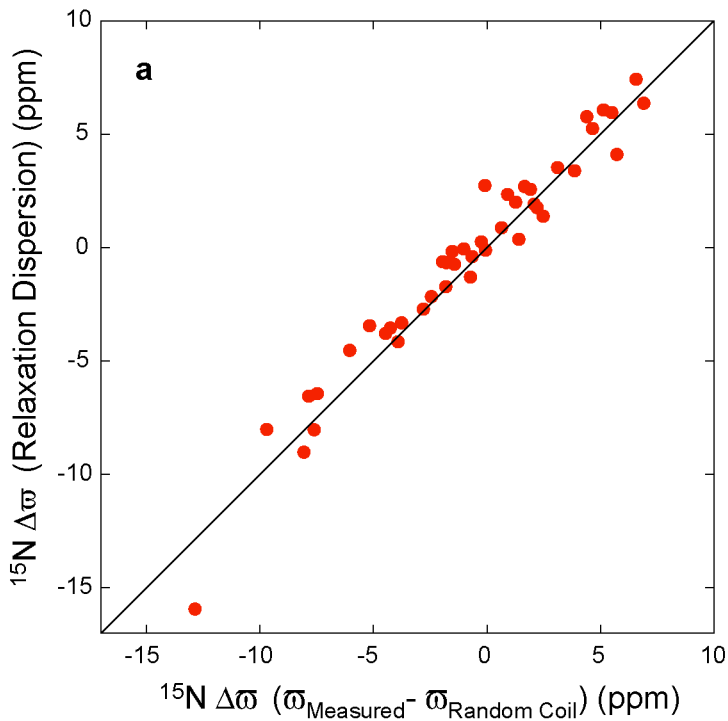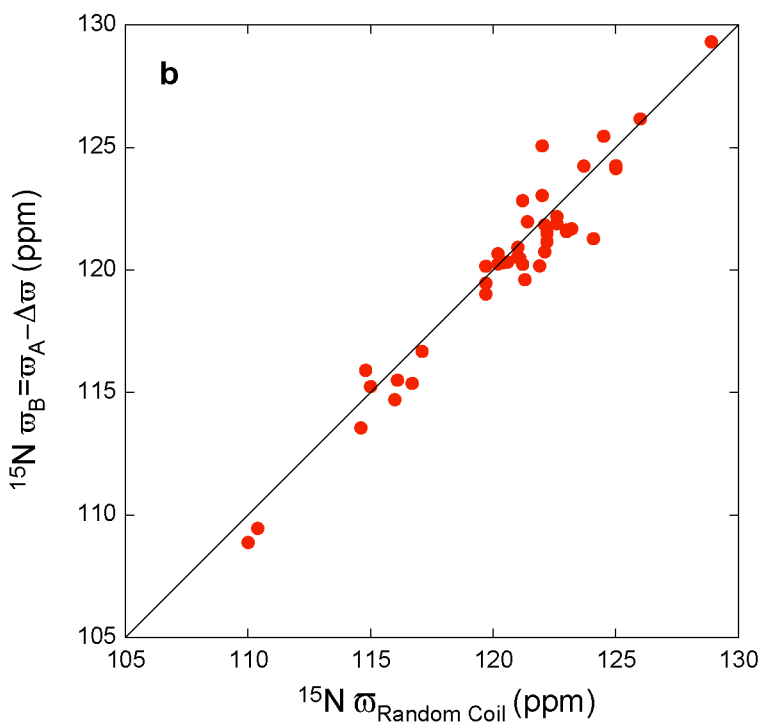

Supplement: pnas_0708296104_5.pdf [file pnas_0708296104_5.pdf]

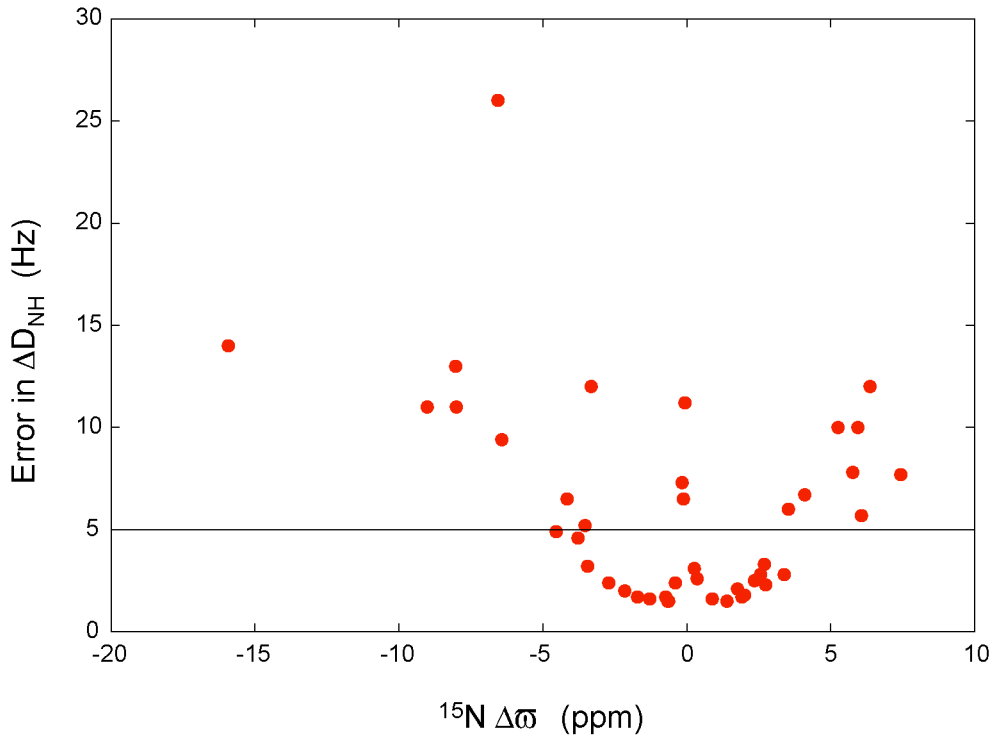

Supplement: pnas_0708296104_6.pdf [file pnas_0708296104_6.pdf]
